# Supplementary material for: Real time retrieval of volcanic cloud particles and SO 2 by satelliteusing an improved simplified approach
Source: Copernicus journal article supplement (doi:10.5194/amt-9-3053-2016), 2016-07-15
Supplement: Supplementary file 1 [file amt-9-3053-2016-supplement.pdf]

Supplement of Atmos. Meas. Tech., 9, 3053–3062, 2016  
<http://www.atmos-meas-tech.net/9/3053/2016/>  
doi:10.5194/amt-9-3053-2016-supplement  
© Author(s) 2016. CC Attribution 3.0 License.

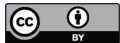

*Supplement of*

## **Real time retrieval of volcanic cloud particles and SO<sub>2</sub> by satellite using an improved simplified approach**

**Sergio Pugnaghi et al.**

*Correspondence to:* Sergio Pugnaghi ([sergio.pugnaghi@unimore.it](mailto:sergio.pugnaghi@unimore.it))

The copyright of individual parts of the supplement might differ from the CC-BY 3.0 licence.

1

2 Section 2 shows how the plume transmittance can be computed from the measured satellite  
3 radiance images, with only the plume temperature as additional input. In order to implement the VPR  
4 procedure, the parameters of Eqs. (3), (4), (5), and (7) have to be calculated first. The preliminary  
5 analysis required to compute these parameters and their resulting values is briefly described below  
6 for some aerosol particle types and for two volcanoes (Mt. Etna, Sicily, Italy, and Eyjafjallajökull,  
7 Iceland).

8 As already noted, the relationships between radiance measured by the sensor and the plume  
9 transmittance depend mainly on aerosol optical properties and, to a lesser extent, on local climatology  
10 and sensor response functions. A set of different parameters is therefore required for each type of  
11 aerosol, volcanic area, and radiometer used. To compute this set of parameters a series of  
12 representative scenarios are simulated with the MODTRAN radiative transfer model. The parameters  
13 given in the Tables (from S1 to S6) derive from a series of 27648 scenarios computed for each aerosol  
14 type with the volcanic cloud modelled as a uniform layer of one kilometre thickness located at 4  
15 different heights (4, 6, 8, and 10 km). The volcanic cloud contains spherical particles of 8 different  
16 radii ( $R_e$ , the applied range is indicated in the tables), with 6 optical depths at 550 nm ( $\delta^*$ , in the range  
17 0-1.25), seen under 12 vertical zenith angles ( $\theta_z$ ) within the foreseen MODIS range of 0-65 degrees  
18 (or air mass factor  $\mu$ ), embedded in 12 monthly mean atmospheres. From these simulations, the total  
19 transmittance  $\tau \cdot \tau_p$ , the up-welling  $L_u$ , and down-welling  $L_d$  radiances are available. Now, assuming  
20 under the volcanic cloud an ocean surface with emissivity  $\varepsilon = 0.98$  and temperature  $T_s$ , which is the  
21 climatic monthly mean temperature of the ocean area representative of the considered volcano, it is  
22 possible to compute the radiance measured by the sensor with the following Eq. (S1):

23

$$24 \quad L_p = [\varepsilon \cdot B(T_s) + (1 - \varepsilon) \cdot L_d] \cdot \tau \cdot \tau_p + L_u \quad (S1)$$

25

26 From the radiance  $L_p$  and the plume transmittance  $\tau_p$  it is easy to compute the two linear regressions  
27 shown in Fig. 3 and their intersection point for each month and plume height. The final step is the  
28 determination of the parameters of Eqs. (3), (4), and (5). These are computed from the linear fit of 48  
29 values of  $B_{up}$ ,  $B_{dn}$ , and  $\tau_t$  (12 months and 4 heights) as functions of  $B_p$ , the Planck function at the  
30 mean plume temperature  $T_p$ .

31 Mt. Etna (Sicily, Italy) and Eyjafjallajökull (Iceland) volcanoes were considered with the typical  
32 monthly mean climatological atmospheres (pressure, temperature, and relative humidity) and sea  
33 surface temperature computed for each specific area. For the Mt. Etna volcano, the upper-air

1 atmospheric radio sounding measured at the WMO Trapani station, and the sea temperature from the  
2 NOAA in the area 14-18 East, 34-38 North were used (see Pugnaghi et al. 2013).

3 The monthly mean values used for the Eyjafjallajökull area (330-350 East, 58-62 North) were  
4 obtained from the NCEP database of the NOAA/ESRL Physical Sciences Division  
5 (<http://www.esrl.noaa.gov/psd/data/reanalysis/reanalysis.shtml>).

6 In Tables S1 to S6 the parameters of Eqs. (3), (4), (5) are reported for some volcanic ash types of  
7 known complex refractive index. These are pumice volcanic particles from Volz (1973), which  
8 appears to work well for the Mt. Etna volcano, along with andesite (often used for Eyjafjallajökull)  
9 and obsidian, both from Pollack et al. (1973). The laboratory measurements of the refractive index of  
10 the Eyjafjallajökull ash deposits collected by D. Peters (2013) after the recent 2010 eruption were  
11 also available and have been used to compute the VPR parameters.

12 Two other kinds of particles were also taken into account: water droplets and ice crystal. The ice  
13 formation is a known phenomenon that occur also inside a volcanic cloud (Rose et al., 1994; Rose et  
14 al., 2004; Durant et al., 2008).

15 The parameters, band by band, reported in Tables S1 to S6 are very similar for the Terra and Aqua  
16 satellites because their differences are only due to minor variations in the effective wavelengths used  
17 for the two MODIS radiometers. No major variations were identified for the different volcanic areas,  
18 while there are more obvious variations due to the different ash types and even greater variations have  
19 been observed between ash and non-ash particles.

20 Table S7 reports the parameters required by Eq. (7) to compute  $B_s$  from the Planck emission  $B_p$ .  
21 A series of representative scenarios again had to be simulated. In this case a 1 km thick volcanic cloud  
22 was considered containing only sulphur dioxide (10 values in the range 1-10 g m<sup>-2</sup>), located at the  
23 same 4 previous altitudes and embedded in the same previous 12 monthly mean atmospheres, with  
24 the plumes observed under 12 zenith angles (0-65 deg). This produced 5760 simulated scenarios.  
25 The computed coefficients shown in Table S7 are very similar for both the two volcanoes, and for  
26 the two MODIS spectrometers.

27 In Tables S1 to S7, the correlation coefficients  $r^2$  between the MODTRAN simulated transmittances  
28 and those obtained from the VPR procedure (using Eqs. (1), (2), (6)) are also reported, for aerosols  
29 and SO<sub>2</sub> separately.

1 Table S1: Coefficients of Eqs. (3), (4), (5) for pumice (Volz, 1973) particles, radius range 0.8-10  $\mu\text{m}$   
 2 and correlation coefficients  $r^2$  between the true and estimated aerosol transmittances.

| <b>Volcano</b>       | <b>Satellite</b> | <b>Band<br/>(<math>\mu\text{m}</math>)</b> | <b><math>a_{\text{up}}</math></b> | <b><math>b_{\text{up}}</math></b> | <b><math>a_{\text{dn}}</math></b> | <b><math>b_{\text{dn}}</math></b> | <b><math>a_{\text{tt}}</math></b> | <b><math>b_{\text{tt}}</math></b> | <b><math>r^2</math></b> |
|----------------------|------------------|--------------------------------------------|-----------------------------------|-----------------------------------|-----------------------------------|-----------------------------------|-----------------------------------|-----------------------------------|-------------------------|
| Mt. Etna             | <i>Terra</i>     | 8.7                                        | 0.572                             | 2.589                             | 0.738                             | 1.009                             | -0.0163                           | 0.337                             | 0.9952                  |
|                      |                  | 11                                         | 0.621                             | 2.449                             | 0.793                             | 0.927                             | -0.0185                           | 0.358                             | 0.9970                  |
|                      |                  | 12                                         | 0.591                             | 2.500                             | 0.782                             | 0.931                             | -0.0226                           | 0.353                             | 0.9962                  |
|                      | <i>Aqua</i>      | 8.7                                        | 0.570                             | 2.611                             | 0.735                             | 1.001                             | -0.0169                           | 0.336                             | 0.9952                  |
|                      |                  | 11                                         | 0.620                             | 2.445                             | 0.793                             | 0.927                             | -0.0185                           | 0.358                             | 0.9970                  |
|                      |                  | 12                                         | 0.591                             | 2.502                             | 0.782                             | 0.932                             | -0.0226                           | 0.353                             | 0.9962                  |
| Eyjafjallaj<br>ökull | <i>Terra</i>     | 8.7                                        | 0.560                             | 2.155                             | 0.682                             | 1.159                             | -0.0183                           | 0.327                             | 0.9956                  |
|                      |                  | 11                                         | 0.604                             | 2.153                             | 0.730                             | 1.202                             | -0.0214                           | 0.347                             | 0.9971                  |
|                      |                  | 12                                         | 0.574                             | 2.225                             | 0.719                             | 1.199                             | -0.0255                           | 0.338                             | 0.9964                  |
|                      | <i>Aqua</i>      | 8.7                                        | 0.558                             | 2.175                             | 0.678                             | 1.162                             | -0.0192                           | 0.326                             | 0.9956                  |
|                      |                  | 11                                         | 0.604                             | 2.154                             | 0.730                             | 1.202                             | -0.0215                           | 0.347                             | 0.9971                  |
|                      |                  | 12                                         | 0.573                             | 2.226                             | 0.719                             | 1.200                             | -0.0253                           | 0.338                             | 0.9964                  |

3

4

1 Table S2: Coefficients of Eqs. (3), (4), (5) for andesite (Pollack et al. 1973) particles, radius range  
 2 0.8-10  $\mu\text{m}$  and correlation coefficients  $r^2$  between the true and estimated aerosol transmittances.

| <b>Volcano</b>       | <b>Satellite</b> | <b>Band<br/>(<math>\mu\text{m}</math>)</b> | <b><math>a_{\text{up}}</math></b> | <b><math>b_{\text{up}}</math></b> | <b><math>a_{\text{dn}}</math></b> | <b><math>b_{\text{dn}}</math></b> | <b><math>a_{\text{tt}}</math></b> | <b><math>b_{\text{tt}}</math></b> | <b><math>r^2</math></b> |
|----------------------|------------------|--------------------------------------------|-----------------------------------|-----------------------------------|-----------------------------------|-----------------------------------|-----------------------------------|-----------------------------------|-------------------------|
| Mt. Etna             | <i>Terra</i>     | 8.7                                        | 0.804                             | 1.068                             | 0.803                             | 0.553                             | -0.0068                           | 0.312                             | 0.9975                  |
|                      |                  | 11                                         | 0.679                             | 2.080                             | 0.809                             | 0.849                             | -0.0176                           | 0.344                             | 0.9968                  |
|                      |                  | 12                                         | 0.551                             | 2.764                             | 0.760                             | 1.042                             | -0.0204                           | 0.348                             | 0.9956                  |
|                      | <i>Aqua</i>      | 8.7                                        | 0.800                             | 1.113                             | 0.798                             | 0.568                             | -0.0059                           | 0.300                             | 0.9972                  |
|                      |                  | 11                                         | 0.678                             | 2.088                             | 0.809                             | 0.850                             | -0.0176                           | 0.345                             | 0.9968                  |
|                      |                  | 12                                         | 0.550                             | 2.768                             | 0.760                             | 1.044                             | -0.0203                           | 0.348                             | 0.9956                  |
| Eyjafjall<br>ajökull | <i>Terra</i>     | 8.7                                        | 0.802                             | 0.898                             | 0.771                             | 0.659                             | -0.0083                           | 0.304                             | 0.9976                  |
|                      |                  | 11                                         | 0.664                             | 1.836                             | 0.751                             | 1.109                             | -0.0187                           | 0.322                             | 0.9968                  |
|                      |                  | 12                                         | 0.533                             | 2.453                             | 0.695                             | 1.301                             | -0.0233                           | 0.337                             | 0.9958                  |
|                      | <i>Aqua</i>      | 8.7                                        | 0.797                             | 0.937                             | 0.771                             | 0.652                             | -0.0000                           | 0.263                             | 0.9974                  |
|                      |                  | 11                                         | 0.663                             | 1.843                             | 0.750                             | 1.111                             | -0.0187                           | 0.322                             | 0.9968                  |
|                      |                  | 12                                         | 0.532                             | 2.456                             | 0.695                             | 1.312                             | -0.0231                           | 0.337                             | 0.9958                  |

3

4

1 Table S3: Coefficients of Eqs. (3), (4), (5) for obsidian (Pollack et al. 1973) particles, radius range  
 2 0.8-10  $\mu\text{m}$  and correlation coefficients  $r^2$  between the true and estimated aerosol transmittances.

| <b>Volcano</b>       | <b>Satellite</b> | <b>Band<br/>(<math>\mu\text{m}</math>)</b> | <b><math>a_{\text{up}}</math></b> | <b><math>b_{\text{up}}</math></b> | <b><math>a_{\text{dn}}</math></b> | <b><math>b_{\text{dn}}</math></b> | <b><math>a_{\text{tt}}</math></b> | <b><math>b_{\text{tt}}</math></b> | <b><math>r^2</math></b> |
|----------------------|------------------|--------------------------------------------|-----------------------------------|-----------------------------------|-----------------------------------|-----------------------------------|-----------------------------------|-----------------------------------|-------------------------|
| Mt. Etna             | <i>Terra</i>     | 8.7                                        | 0.740                             | 1.483                             | 0.761                             | 0.814                             | -0.0035                           | 0.271                             | 0.9925                  |
|                      |                  | 11                                         | 0.617                             | 2.500                             | 0.791                             | 0.941                             | -0.0194                           | 0.348                             | 0.9968                  |
|                      |                  | 12                                         | 0.619                             | 2.406                             | 0.792                             | 0.915                             | -0.194                            | 0.343                             | 0.9960                  |
|                      | <i>Aqua</i>      | 8.7                                        | 0.742                             | 1.479                             | 0.758                             | 0.823                             | -0.0041                           | 0.272                             | 0.9924                  |
|                      |                  | 11                                         | 0.617                             | 2.502                             | 0.791                             | 0.942                             | -0.0193                           | 0.348                             | 0.9968                  |
|                      |                  | 12                                         | 0.619                             | 2.404                             | 0.792                             | 0.915                             | -0.0196                           | 0.344                             | 0.9960                  |
| Eyjafjall<br>ajökull | <i>Terra</i>     | 8.7                                        | 0.733                             | 1.250                             | 0.714                             | 0.946                             | 0.0034                            | 0.227                             | 0.9923                  |
|                      |                  | 11                                         | 0.601                             | 2.194                             | 0.730                             | 1.204                             | -0.0215                           | 0.331                             | 0.9969                  |
|                      |                  | 12                                         | 0.602                             | 2.143                             | 0.733                             | 1.162                             | -0.0215                           | 0.328                             | 0.9962                  |
|                      | <i>Aqua</i>      | 8.7                                        | 0.735                             | 1.244                             | 0.712                             | 0.953                             | 0.0041                            | 0.222                             | 0.9922                  |
|                      |                  | 11                                         | 0.601                             | 2.196                             | 0.730                             | 1.205                             | -0.0214                           | 0.331                             | 0.9967                  |
|                      |                  | 12                                         | 0.602                             | 2.141                             | 0.734                             | 1.161                             | -0.0216                           | 0.329                             | 0.9963                  |

3

4

1 Table S4: Coefficients of Eqs. (3), (4), (5) for Eyja ash particles (Peters, 2013), radius range 0.8-10  
 2  $\mu\text{m}$  and correlation coefficients  $r^2$  between the true and estimated aerosol transmittances.

| <b>Volcano</b>       | <b>Satellite</b> | <b>Band<br/>(<math>\mu\text{m}</math>)</b> | <b><math>a_{\text{up}}</math></b> | <b><math>b_{\text{up}}</math></b> | <b><math>a_{\text{dn}}</math></b> | <b><math>b_{\text{dn}}</math></b> | <b><math>a_{\text{tt}}</math></b> | <b><math>b_{\text{tt}}</math></b> | <b><math>r^2</math></b> |
|----------------------|------------------|--------------------------------------------|-----------------------------------|-----------------------------------|-----------------------------------|-----------------------------------|-----------------------------------|-----------------------------------|-------------------------|
| Eyjafjall<br>ajökull | <i>Terra</i>     | 8.7                                        | 0.769                             | 1.079                             | 0.746                             | 0.818                             | 0.0066                            | 0.241                             | 0.9955                  |
|                      |                  | 11                                         | 0.658                             | 1.851                             | 0.745                             | 1.110                             | -0.0205                           | 0.316                             | 0.9967                  |
|                      |                  | 12                                         | 0.601                             | 2.113                             | 0.735                             | 1.150                             | -0.0228                           | 0.333                             | 0.9964                  |
|                      | <i>Aqua</i>      | 8.7                                        | 0.769                             | 1.083                             | 0.743                             | 0.824                             | 0.0077                            | 0.227                             | 0.9953                  |
|                      |                  | 11                                         | 0.657                             | 1.853                             | 0.745                             | 1.111                             | -0.0205                           | 0.317                             | 0.9967                  |
|                      |                  | 12                                         | 0.602                             | 2.108                             | 0.736                             | 1.148                             | -0.0226                           | 0.334                             | 0.9964                  |

3

4

1 Table S5: Coefficients of Eqs. (3), (4), (5) for water droplets, radius range 2-50  $\mu\text{m}$  and correlation  
 2 coefficients  $r^2$  between the true and estimated aerosol transmittances.

| <b>Volcano</b>       | <b>Satellite</b> | <b>Band<br/>(<math>\mu\text{m}</math>)</b> | <b><math>a_{\text{up}}</math></b> | <b><math>b_{\text{up}}</math></b> | <b><math>a_{\text{dn}}</math></b> | <b><math>b_{\text{dn}}</math></b> | <b><math>a_{\text{tt}}</math></b> | <b><math>b_{\text{tt}}</math></b> | <b><math>r^2</math></b> |
|----------------------|------------------|--------------------------------------------|-----------------------------------|-----------------------------------|-----------------------------------|-----------------------------------|-----------------------------------|-----------------------------------|-------------------------|
| Mt. Etna             | <i>Terra</i>     | 8.7                                        | 0.615                             | 2.486                             | 0.751                             | 1.016                             | -0.0160                           | 0.355                             | 0.9847                  |
|                      |                  | 11                                         | 0.867                             | 0.946                             | 0.920                             | 0.288                             | -0.0184                           | 0.415                             | 0.9992                  |
|                      |                  | 12                                         | 0.888                             | 0.744                             | 0.927                             | 0.260                             | -0.0127                           | 0.378                             | 0.9995                  |
|                      | <i>Aqua</i>      | 8.7                                        | 0.616                             | 2.485                             | 0.749                             | 1.036                             | -0.0172                           | 0.365                             | 0.9848                  |
|                      |                  | 11                                         | 0.867                             | 0.943                             | 0.920                             | 0.288                             | -0.0184                           | 0.415                             | 0.9992                  |
|                      |                  | 12                                         | 0.887                             | 0.745                             | 0.927                             | 0.260                             | -0.0127                           | 0.378                             | 0.9995                  |
| Eyjafjall<br>ajökull | <i>Terra</i>     | 8.7                                        | 0.605                             | 2.054                             | 0.709                             | 1.079                             | -0.0211                           | 0.361                             | 0.9850                  |
|                      |                  | 11                                         | 0.861                             | 0.838                             | 0.896                             | 0.411                             | -0.0243                           | 0.430                             | 0.9991                  |
|                      |                  | 12                                         | 0.882                             | 0.679                             | 0.903                             | 0.384                             | -0.0148                           | 0.378                             | 0.9995                  |
|                      | <i>Aqua</i>      | 8.7                                        | 0.607                             | 2.053                             | 0.707                             | 1.097                             | -0.0231                           | 0.375                             | 0.9851                  |
|                      |                  | 11                                         | 0.862                             | 0.836                             | 0.896                             | 0.410                             | -0.0242                           | 0.430                             | 0.9991                  |
|                      |                  | 12                                         | 0.882                             | 0.679                             | 0.903                             | 0.385                             | -0.0148                           | 0.378                             | 0.9995                  |

3

4



1 Table S6: Coefficients of Eqs. (3), (4), (5) for ice particles, radius range 2-50  $\mu\text{m}$  and correlation  
 2 coefficients  $r^2$  between the true and estimated aerosol transmittances.

| <b>Volcano</b>       | <b>Satellite</b> | <b>Band<br/>(<math>\mu\text{m}</math>)</b> | <b><math>a_{\text{up}}</math></b> | <b><math>b_{\text{up}}</math></b> | <b><math>a_{\text{dn}}</math></b> | <b><math>b_{\text{dn}}</math></b> | <b><math>a_{\text{tt}}</math></b> | <b><math>b_{\text{tt}}</math></b> | <b><math>r^2</math></b> |
|----------------------|------------------|--------------------------------------------|-----------------------------------|-----------------------------------|-----------------------------------|-----------------------------------|-----------------------------------|-----------------------------------|-------------------------|
| Mt. Etna             | <i>Terra</i>     | 8.7                                        | 0.617                             | 2.464                             | 0.748                             | 1.021                             | -0.0180                           | 0.361                             | 0.9847                  |
|                      |                  | 11                                         | 0.882                             | 0.830                             | 0.918                             | 0.307                             | -0.0112                           | 0.376                             | 0.9995                  |
|                      |                  | 12                                         | 0.827                             | 1.184                             | 0.891                             | 0.451                             | -0.0123                           | 0.348                             | 0.9988                  |
|                      | <i>Aqua</i>      | 8.7                                        | 0.615                             | 2.484                             | 0.749                             | 1.014                             | -0.0177                           | 0.361                             | 0.9848                  |
|                      |                  | 11                                         | 0.882                             | 0.837                             | 0.917                             | 0.309                             | -0.0112                           | 0.375                             | 0.9995                  |
|                      |                  | 12                                         | 0.826                             | 0.826                             | 0.891                             | 0.452                             | -0.0124                           | 0.349                             | 0.9988                  |
| Eyjafjall<br>ajökull | <i>Terra</i>     | 8.7                                        | 0.607                             | 2.037                             | 0.706                             | 1.087                             | -0.0241                           | 0.369                             | 0.9849                  |
|                      |                  | 11                                         | 0.876                             | 0.749                             | 0.892                             | 0.436                             | -0.0136                           | 0.379                             | 0.9995                  |
|                      |                  | 12                                         | 0.818                             | 1.065                             | 0.856                             | 0.617                             | -0.0133                           | 0.339                             | 0.9988                  |
|                      | <i>Aqua</i>      | 8.7                                        | 0.605                             | 2.055                             | 0.707                             | 1.082                             | -0.0236                           | 0.369                             | 0.9851                  |
|                      |                  | 11                                         | 0.876                             | 0.752                             | 0.892                             | 0.439                             | -0.0135                           | 0.378                             | 0.9995                  |
|                      |                  | 12                                         | 0.817                             | 1.073                             | 0.855                             | 0.617                             | -0.0139                           | 0.342                             | 0.9988                  |

3

4

1 Table S7: Coefficients of Eq. (7), band at 8.7  $\mu\text{m}$  and correlation coefficients  $r^2$  between the true  
2 and estimated  $\text{SO}_2$  transmittances.

| <b>Volcano</b>   | <b>Satellite</b> | <b><math>a_s</math></b> | <b><math>b_s</math></b> | <b><math>r^2</math></b> |
|------------------|------------------|-------------------------|-------------------------|-------------------------|
| Mt. Etna         | <i>Terra</i>     | 0.9419                  | 0.1120                  | 0.9996                  |
|                  | <i>Aqua</i>      | 0.9412                  | 0.1101                  | 0.9996                  |
| Eyjafjallajökull | <i>Terra</i>     | 0.9492                  | 0.0918                  | 0.9997                  |
|                  | <i>Aqua</i>      | 0.9477                  | 0.0934                  | 0.9997                  |

3

4
